# Supplementary material for: Anti-podocalyxin antibody exerts antitumor effects via antibody-dependent cellular cytotoxicity in mouse xenograft models of oral squamous cell carcinoma
Source: PubMed Central journal article supplement (PMC5976479; doi:10.18632/oncotarget.25132), 2018-04-27
Supplement: oncotarget-09-22480-s001.pdf [file oncotarget-09-22480-s001.pdf]

## Anti-podocalyxin antibody exerts antitumor effects via antibody-dependent cellular cytotoxicity in mouse xenograft models of oral squamous cell carcinoma

### SUPPLEMENTARY MATERIALS

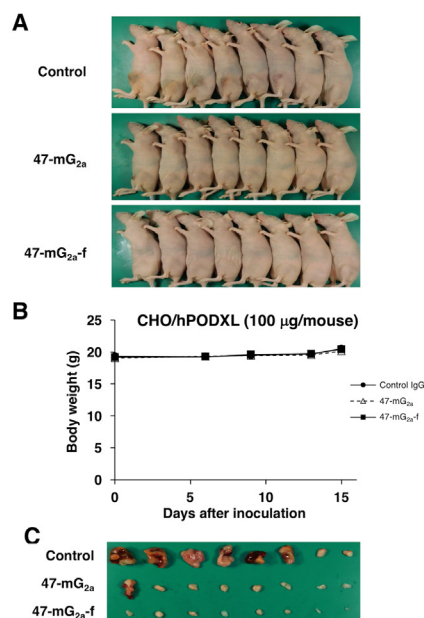

**Supplementary Figure 1: Antitumor activity of 47-mG<sub>2a</sub> and 47-mG<sub>2a</sub>-f against CHO/hPODXL xenografts (100 µg/day; 5 mg/kg).** (A) Comparison of the tumor size and tumor incidence of CHO/hPODXL xenograft in nude mice (day 16). (B) Body weight. The values are means ± SEM (C) Comparison of the tumor size (day 16).

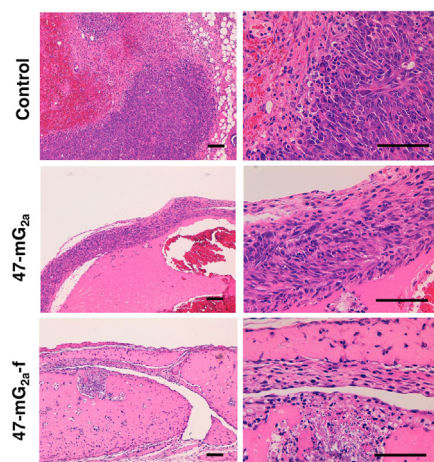

**Supplementary Figure 2: Hematoxylin & eosin staining of CHO/hPODXL xenografts (100 µg/day; 5 mg/kg).** Scale bar = 100 µm.

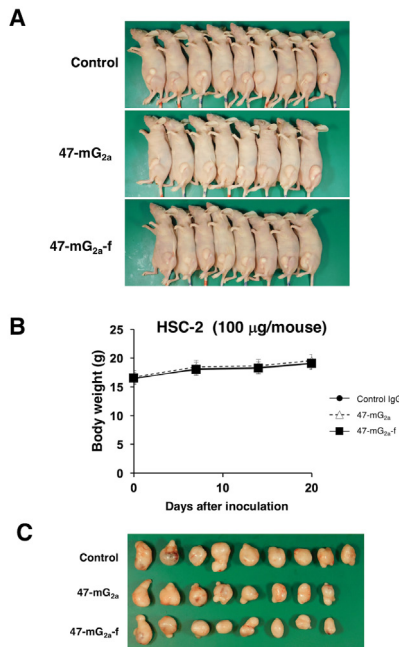

**Supplementary Figure 3: Antitumor activity of 47-mG<sub>2a</sub> and 47-mG<sub>2a</sub>-f against HSC-2 xenografts (100 µg/day; 5 mg/kg).** (A) Comparison of the tumor size and tumor incidence of HSC-2 xenograft in nude mice (day 20). (B) Body weight. The values are means ± SEM (C) Comparison of the tumor size (day 20).

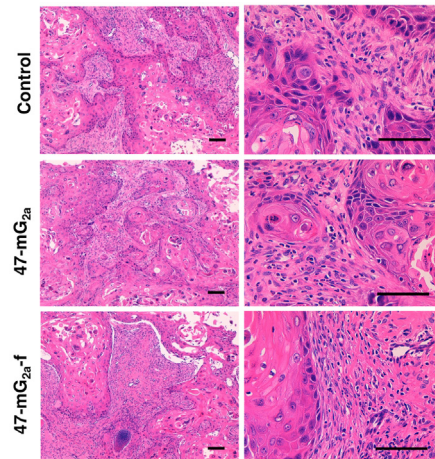

**Supplementary Figure 4: Hematoxylin & eosin staining of HSC-2 xenografts (100 µg/day; 5 mg/kg).** Scale bar = 100 µm.

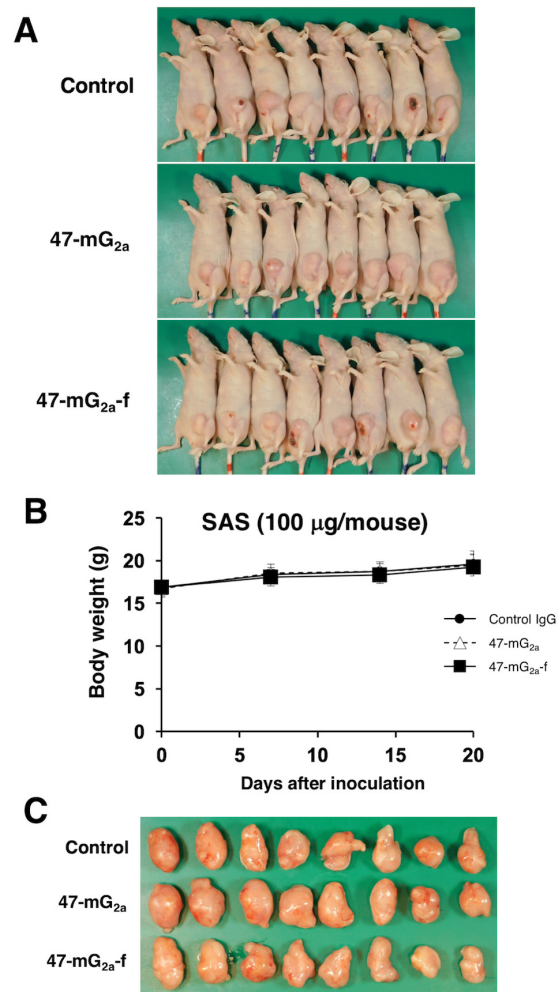

**Supplementary Figure 5: Antitumor activity of 47-mG<sub>2a</sub> and 47-mG<sub>2a</sub>-f against SAS xenografts (100 µg/day; 5 mg/kg).** (A) Comparison of the tumor size and tumor incidence of SAS xenograft in nude mice (day 20). (B) Body weight. The values are means ± SEM (C) Comparison of the tumor size (day 20).

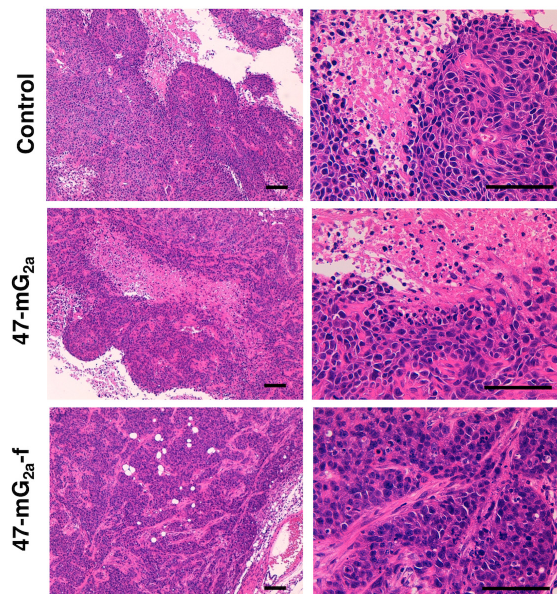

**Supplementary Figure 6: Hematoxylin & eosin staining of SAS xenografts (100 µg/day; 5 mg/kg).** Scale bar = 100 µm.

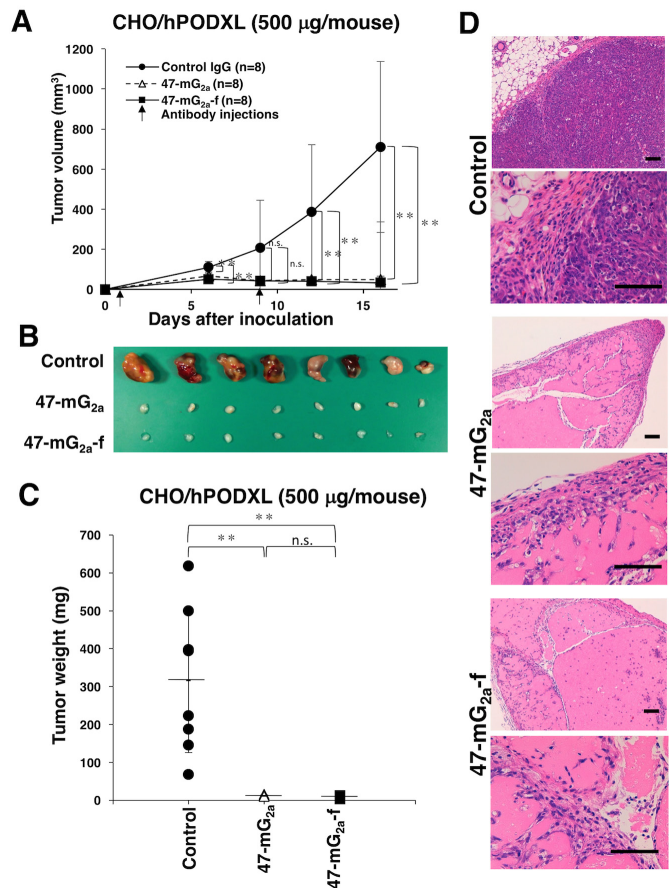

**Supplementary Figure 7: Antitumor activity of 47-mG<sub>2a</sub> and 47-mG<sub>2a</sub>-f against CHO/hPODXL xenografts (500  $\mu\text{g}/\text{day}$ ; 25 mg/kg).** (A) Tumor volume of CHO/hPODXL xenografts. CHO/hPODXL cells were injected subcutaneously into female nude mice. The indicated antibodies (500  $\mu\text{g}/\text{day}$ ; 25 mg/kg) were administered intraperitoneally 1 and 9 days after cancer cell inoculation. The tumor volume was measured at the indicated time points. The values are means  $\pm$  SEM. (B) Comparison of tumor size (day 16). (C) Tumor weight of CHO/hPODXL xenografts (day 16). (D) Hematoxylin & eosin staining of CHO/hPODXL xenografts. An asterisk indicates statistical significance (\*\*P < 0.01, Tukey-Kramer's test). Scale bar = 100  $\mu\text{m}$ .

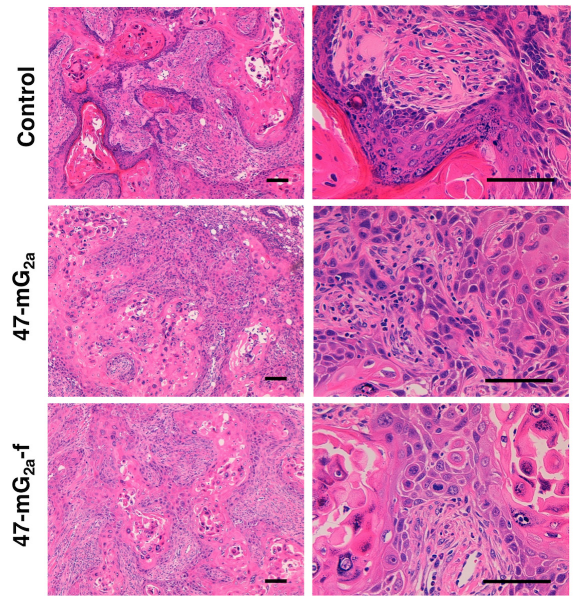

**Supplementary Figure 8: Antitumor activity of 47-mG<sub>2a</sub> and 47-mG<sub>2a</sub>-f against HSC-2 xenografts (500  $\mu\text{g}/\text{day}$ ; 25 mg/kg).** Hematoxylin & eosin staining of HSC-2 xenografts.

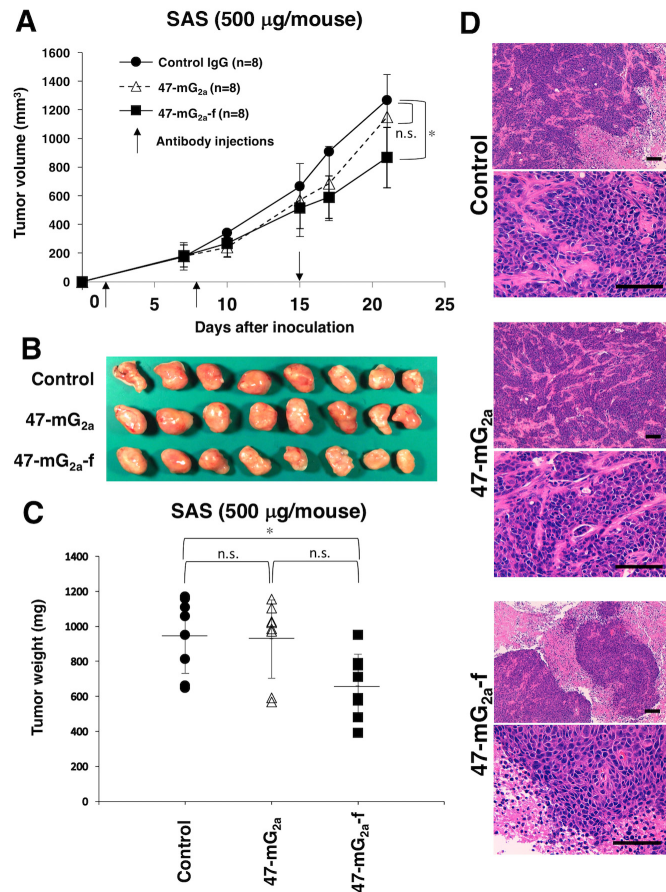

**Supplementary Figure 9: Antitumor activity of 47-mG<sub>2a</sub> and 47-mG<sub>2a-f</sub> against SAS xenografts (500  $\mu\text{g}/\text{day}$ ; 25 mg/kg).** (A) Tumor volume of SAS xenografts. SAS cells were injected subcutaneously into female nude mice. The indicated antibodies (500  $\mu\text{g}/\text{day}$ ; 25 mg/kg) were administered intraperitoneally 1, 8, and 15 days after cancer cell inoculation. The tumor volume was measured at the indicated time points. The values are means  $\pm$  SEM. (B) Comparison of tumor size (day 21). (C) Tumor weight of SAS xenografts (day 21). (D) Hematoxylin & eosin staining of SAS xenografts. An asterisk indicates statistical significance (\*P < 0.05, Tukey-Kramer's test). Scale bar = 100  $\mu\text{m}$ .

**Supplementary Table 1: Immunohistochemical analysis by anti-PODXL mAbs against OSCC.**

See Supplementary File 1
